# Supplementary material for: Construction of intimate Lewis acid and basic sites on an Al2O3–NC composite catalyst with enhanced performance in transfer hydrogenation of cinnamaldehyde
Source: Royal Society of Chemistry journal article supplement (doi:10.1039/d4cy00168k), 2024-01-01
Supplement: d4cy00168k1.pdf [file d4cy00168k1.pdf]

## Supplementary Information

### **Construction of intimate Lewis acid and basic sites on Al<sub>2</sub>O<sub>3</sub>-NC composite catalyst with enhanced performance in transfer hydrogenation of cinnamaldehyde**

Peng Zhang,<sup>a</sup> Lele Bai,<sup>a</sup> Yao Wang,<sup>ab\*</sup> Zhichao Sun,<sup>ab</sup> Ying-Ya Liu,<sup>ab</sup> and Anjie Wang,<sup>ab\*</sup>

<sup>a</sup> State Key Laboratory of Fine Chemicals, School of Chemical Engineering, Dalian University of  
Technology, Dalian 116024, PR China

<sup>b</sup> Liaoning Key Laboratory of Petrochemical Technology and Equipments, Dalian University of  
Technology, Dalian 116024, PR China

\* Corresponding authors

Prof. Anjie Wang and Yao Wang

E-mail: [ajwang@dlut.edu.cn](mailto:ajwang@dlut.edu.cn); [wangyao@dlut.edu.cn](mailto:wangyao@dlut.edu.cn)

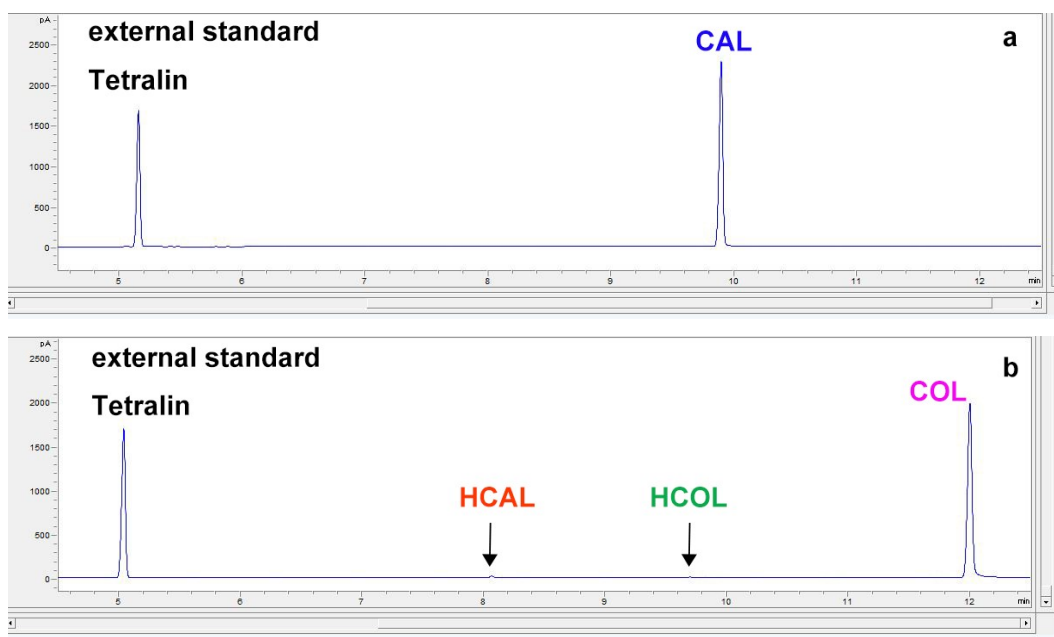

**Fig. S1** GC chromatograms of (a) feed and (b) product of CAL selective hydrogenation. Reaction conditions: 0.1 g 10-Al<sub>2</sub>O<sub>3</sub>-NC, 2 mmol CAL, 30 mL isopropanol, 160 °C, 0.5 MPa N<sub>2</sub>, and 3 h.

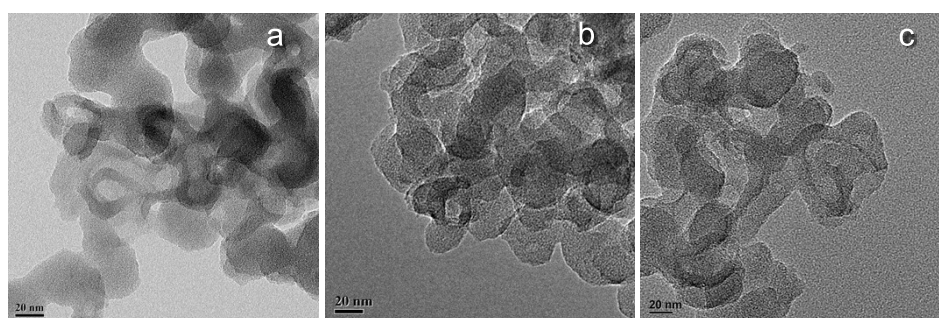

**Fig. S2** TEM images of x-Al<sub>2</sub>O<sub>3</sub>-NC catalysts: (a) 4-Al<sub>2</sub>O<sub>3</sub>-NC, (b) 10-Al<sub>2</sub>O<sub>3</sub>-NC, (c) 16-Al<sub>2</sub>O<sub>3</sub>-NC.

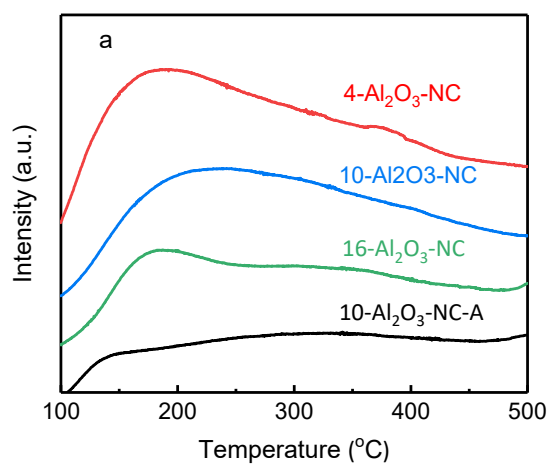

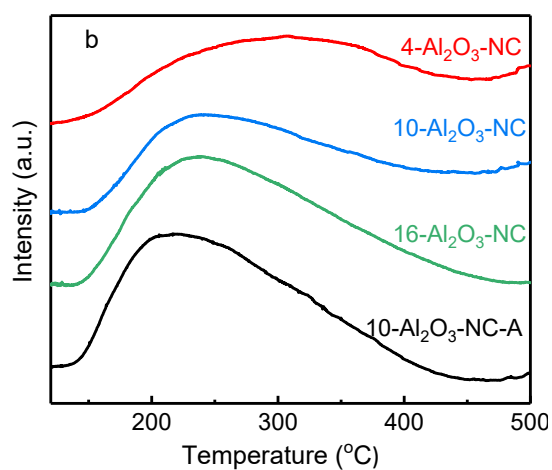

**Fig. S3** (a) CO<sub>2</sub>-TPD profiles and (b) NH<sub>3</sub>-TPD profiles of x-Al<sub>2</sub>O<sub>3</sub>-NC catalysts and 10-Al<sub>2</sub>O<sub>3</sub>-NC-A

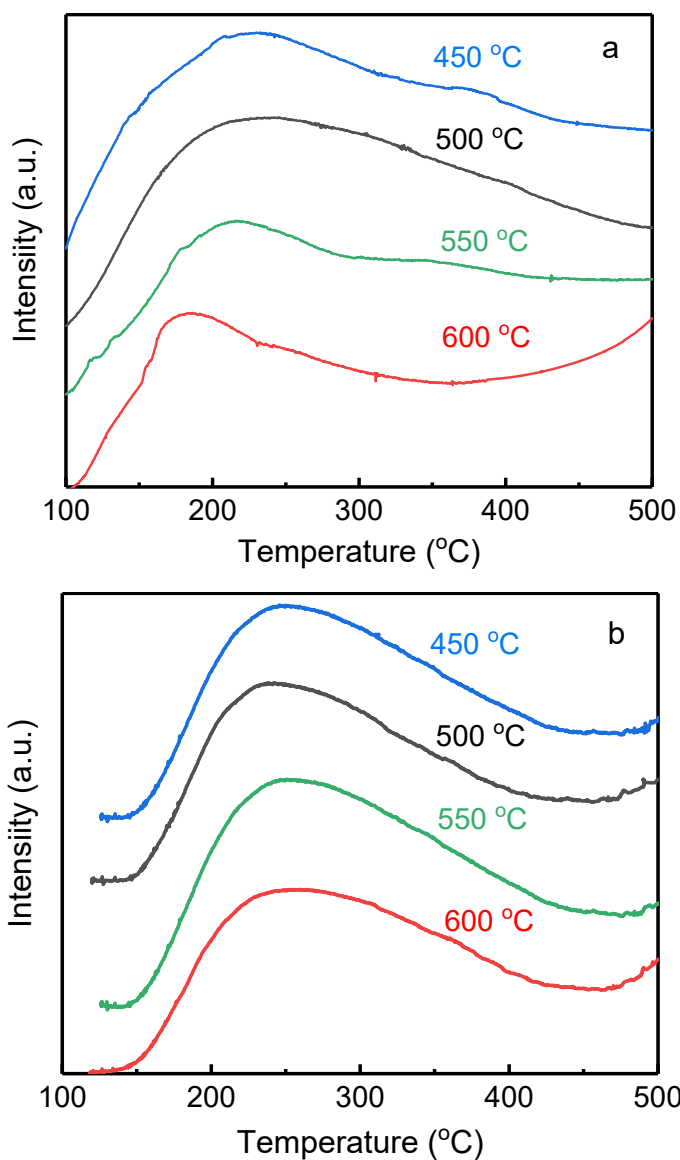

**Fig. S4** (a) CO<sub>2</sub>-TPD profiles and (b) NH<sub>3</sub>-TPD profiles of catalysts treated at different temperatures.

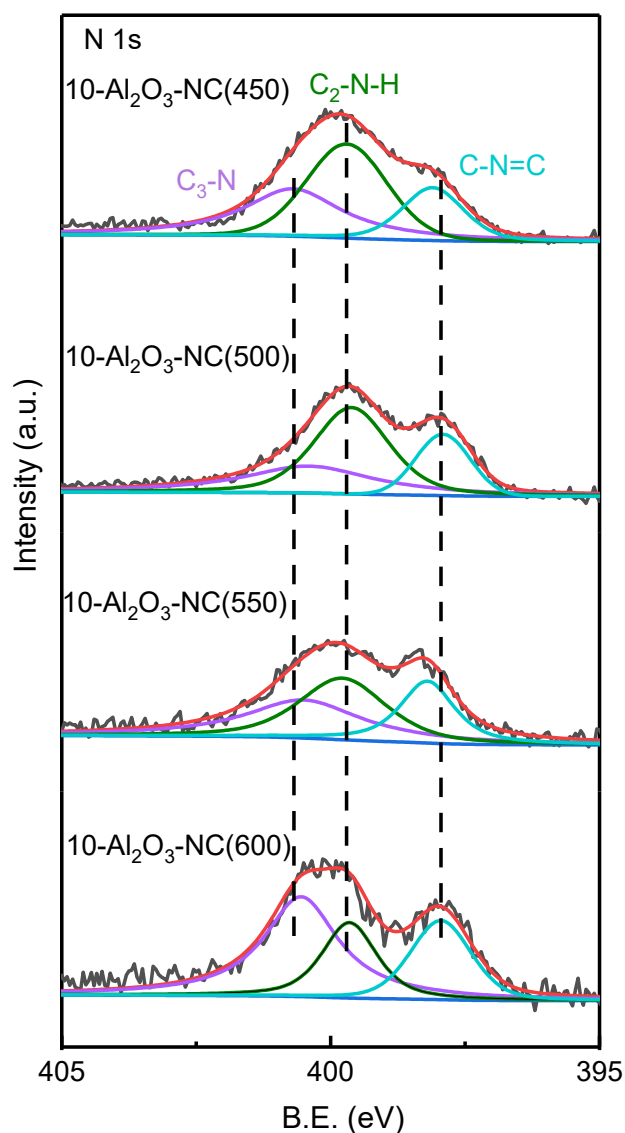

**Fig. S5** XPS spectra of 10-Al<sub>2</sub>O<sub>3</sub>-NC catalysts of N 1s treated at different temperatures.

**Table S1** Nitrogen concentration and relative contents of nitrogen functional groups of 10-Al<sub>2</sub>O<sub>3</sub>-NC treated at different temperatures

| Catalyst                                    | N (at. %) | N content (%) |            |             |
|---------------------------------------------|-----------|---------------|------------|-------------|
|                                             |           | graphitic-N   | pyrrolic-N | pyridinic-N |
| 10-Al <sub>2</sub> O <sub>3</sub> -NC (450) | 3.36      | 31            | 49         | 20          |
| 10-Al <sub>2</sub> O <sub>3</sub> -NC (500) | 3.16      | 33            | 42         | 25          |
| 10-Al <sub>2</sub> O <sub>3</sub> -NC (550) | 3.04      | 40            | 32         | 28          |
| 10-Al <sub>2</sub> O <sub>3</sub> -NC (600) | 2.42      | 45            | 25         | 31          |

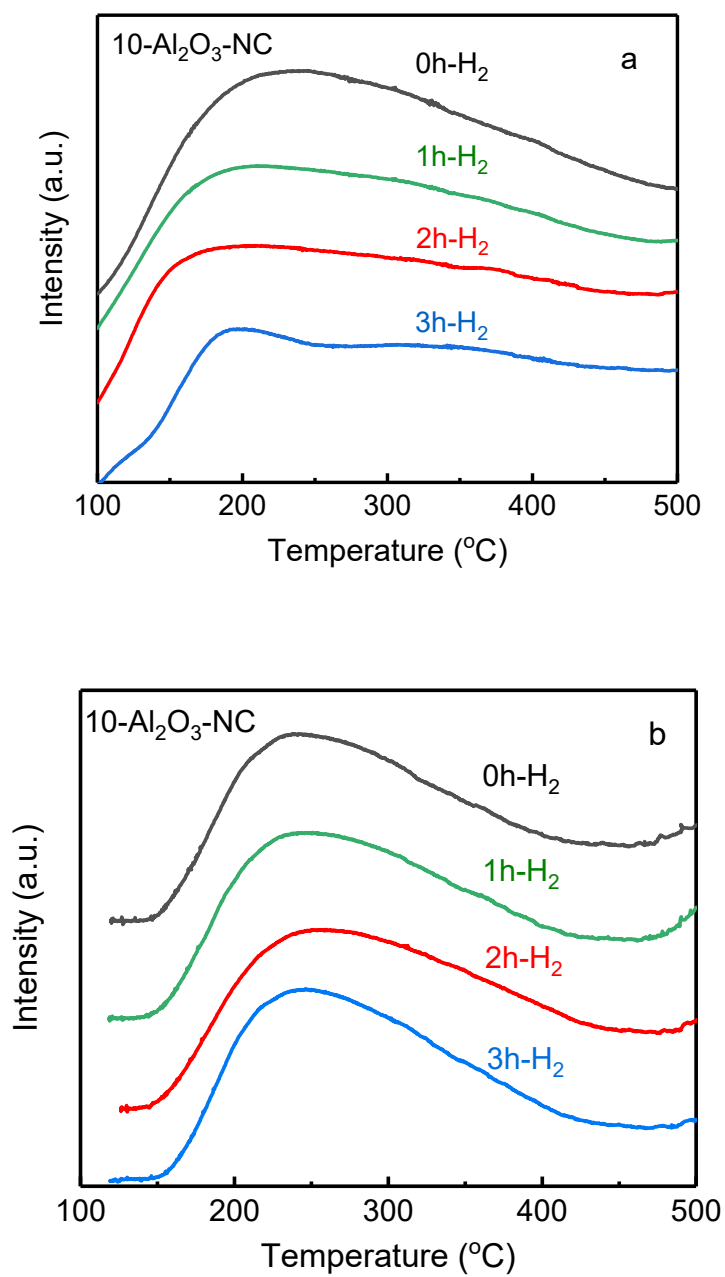

**Fig. S6** CO<sub>2</sub>-TPD profiles (a) and NH<sub>3</sub>-TPD profiles of 10-Al<sub>2</sub>O<sub>3</sub>-NC before and after hydrogen treatment at 550 °C for different times.

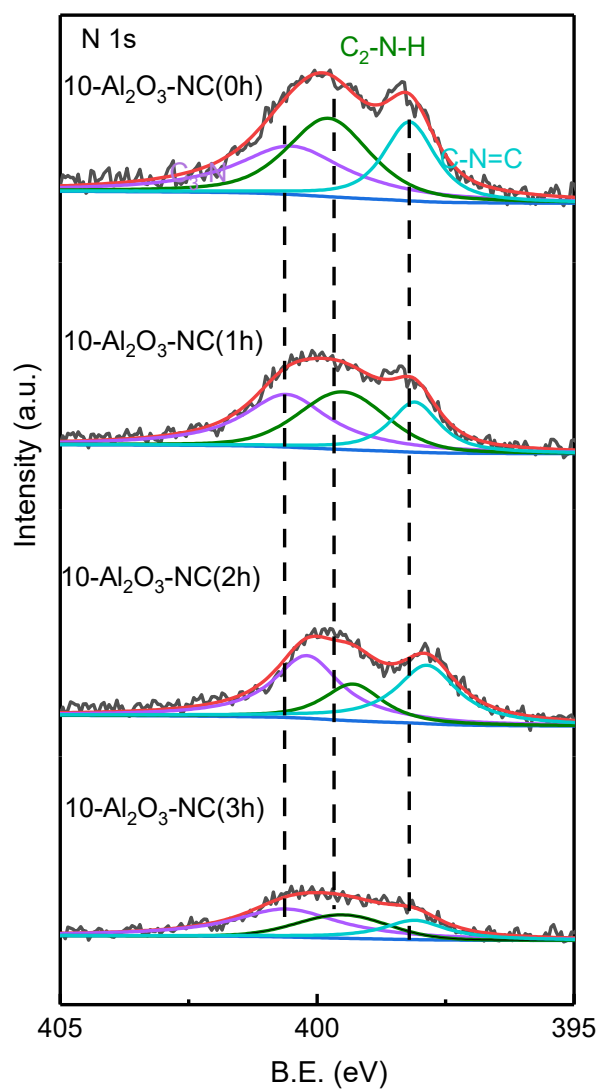

**Fig. S7** XPS spectra in the regions of N 1s of 10-Al<sub>2</sub>O<sub>3</sub>-NC catalysts before and after hydrogen treatment at 550 °C for different times.

**Table S2** Nitrogen concentration and relative contents of nitrogen functional groups of 10-Al<sub>2</sub>O<sub>3</sub>-NC before and after hydrogen treatment at 550 °C for different times

| Catalyst                                   | N (at. %) | N content (%) |            |             |
|--------------------------------------------|-----------|---------------|------------|-------------|
|                                            |           | graphitic-N   | pyrrolic-N | pyridinic-N |
| 10-Al <sub>2</sub> O <sub>3</sub> -NC (0h) | 3.07      | 40            | 32         | 28          |
| 10-Al <sub>2</sub> O <sub>3</sub> -NC (1h) | 2.86      | 37            | 37         | 25          |
| 10-Al <sub>2</sub> O <sub>3</sub> -NC (2h) | 2.04      | 41            | 35         | 24          |
| 10-Al <sub>2</sub> O <sub>3</sub> -NC (3h) | 1.83      | 49            | 33         | 18          |

**Table S3** Comparison of the catalytic performance of 10-Al<sub>2</sub>O<sub>3</sub>-NC in different solvents

| Entry | Solvents    | Conversion/% | COL selectivity/% |
|-------|-------------|--------------|-------------------|
| 1     | Methanol    | 41.7         | 77.1              |
| 2     | Ethanol     | 69.4         | 94.9              |
| 3     | Propanol    | 55.8         | 97.4              |
| 4     | Isopropanol | 99.0         | 98.9              |
| 5     | Butanol     | 37.3         | 97.3              |

Reaction conditions: 2 mmol CAL, 0.1 g 10-Al<sub>2</sub>O<sub>3</sub>-NC, 30 mL isopropanol, 160 °C, and 3 h.
